# Supplementary material for: Aerosol layer height (ALH) retrievals from oxygen absorption bands: intercomparison and validation among different satellite platforms, GEMS, EPIC, and TROPOMI
Source: Copernicus journal article supplement (doi:10.5194/amt-18-327-2025), 2025-01-21
Supplement: Supplementary file 1 [file amt-18-327-2025-supplement.pdf]

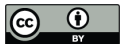

*Supplement of*

## **Aerosol layer height (ALH) retrievals from oxygen absorption bands: intercomparison and validation among different satellite platforms, GEMS, EPIC, and TROPOMI**

**Hyerim Kim et al.**

*Correspondence to:* Xi Chen (xi-chen-4@uiowa.edu) and Jun Wang (jun-wang-1@uiowa.edu)

The copyright of individual parts of the supplement might differ from the article licence.

**Table S1. AERONET sites used in this study.**

| <b>Site_Name</b>    | <b>Latitude</b> | <b>Longitude</b> | <b>Site_Name</b>   | <b>Latitude</b> | <b>Longitude</b> |
|---------------------|-----------------|------------------|--------------------|-----------------|------------------|
| Amity_Univ_Gurgaon  | 28.31733        | 76.91603         | Hankuk_UFS         | 37.33883        | 127.2658         |
| Anmyon              | 36.53854        | 126.3302         | Heng-Chun          | 22.05474        | 120.6995         |
| AOE_Baotou          | 40.8517         | 109.6288         | Hong_Kong_PolyU    | 22.30333        | 114.1797         |
| ARIAKE_TOWER        | 33.10362        | 130.272          | Hong_Kong_Sheung   | 22.4833         | 114.1166         |
| Bac_Lieu            | 9.28            | 105.73           | IAOCA-KRSU         | 42.46383        | 78.52895         |
| Baengnyeong         | 37.96611        | 124.6303         | ICIMOD             | 27.64665        | 85.32327         |
| Bangkok             | 13.7491         | 100.5177         | Ieodo_Station      | 32.12295        | 125.1824         |
| Beijing             | 39.97689        | 116.3814         | IIT_Delhi          | 28.545          | 77.1926          |
| Beijing_PKU         | 39.992          | 116.3102         | Incheon            | 37.56882        | 126.6372         |
| Beijing_RADI        | 40.0048         | 116.3786         | Issyk-Kul          | 42.62278        | 76.98306         |
| Beijing-CAMS        | 39.93333        | 116.3167         | Jaipur             | 26.90582        | 75.80622         |
| Bhola               | 22.22668        | 90.75642         | Kanpur             | 26.51278        | 80.23164         |
| Bidur               | 27.8955         | 85.1401          | Kaohsiung          | 22.67562        | 120.2922         |
| Cape_Fuguei_Station | 25.29745        | 121.5379         | Karunya_University | 10.9353         | 76.7441          |
| Chachoengsao        | 13.5            | 101.45           | KORUS_UNIST_Ulsan  | 35.5819         | 129.1897         |
| Chen-Kung_Univ      | 22.99342        | 120.2047         | Lahore             | 31.47987        | 74.26406         |
| Chiang_Dao          | 19.45472        | 98.9609          | Luang_Namtha       | 20.9311         | 101.4162         |
| Chiang_Mai_Met_Sta  | 18.77113        | 98.97247         | Lulin              | 23.46861        | 120.8736         |
| Dalanzadgad         | 43.57722        | 104.4192         | Manila_Observatory | 14.63525        | 121.0778         |
| Dhaka_University    | 23.72839        | 90.39819         | NAM_CO             | 30.77252        | 90.96245         |
| Dibrugarh_Univ      | 27.45085        | 94.89689         | ND_Marbel_Univ     | 6.496011        | 124.8425         |
| Doi_Ang_Khang       | 19.93245        | 99.0454          | NGHIA_DO           | 21.04778        | 105.7996         |
| Dongsha_Island      | 20.69856        | 116.7288         | Niigata            | 37.846          | 138.942          |
| Douliu              | 23.7117         | 120.5448         | Nong_Khai          | 17.8772         | 102.7167         |
| DRAGON_Hakuba       | 36.70056        | 137.8641         | Noto               | 37.33444        | 137.1369         |
| DRAGON_Iida         | 35.51667        | 137.8422         | Okinawa_Hedo       | 26.867          | 128.249          |
| DRAGON_Ina          | 35.8475         | 137.9613         | Osaka              | 34.65093        | 135.5906         |

|                     |          |          |                   |          |          |
|---------------------|----------|----------|-------------------|----------|----------|
| DRAGON_Kofu         | 35.67889 | 138.5715 | Pokhara           | 28.18664 | 83.97518 |
| DRAGON_Matsumoto    | 36.25139 | 137.9778 | Pune              | 18.53726 | 73.80549 |
| DRAGON_Minowa       | 35.915   | 137.9807 | QOMS_CAS          | 28.365   | 86.94806 |
| DRAGON_Mt_Happo     | 36.69694 | 137.7981 | Seoul_SNU         | 37.45806 | 126.9511 |
| DRAGON_Mt_Haruna    | 36.47556 | 138.8778 | Shirahama         | 33.69345 | 135.3569 |
| DRAGON_Mt_Krigamine | 36.09806 | 138.1683 | Silpakorn_Univ    | 13.81931 | 100.0412 |
| DRAGON_Omachi       | 36.50306 | 137.8514 | Socheongcho       | 37.42313 | 124.738  |
| DRAGON_Suwa         | 36.04556 | 138.1088 | Songkhla_Met_Sta  | 7.184387 | 100.6046 |
| DRAGON_Takayama     | 36.25278 | 137.3045 | Sra_Kaeo          | 13.6889  | 102.5043 |
| EPA-NCU             | 24.96753 | 121.1855 | Tai_Ping          | 10.3755  | 114.362  |
| Erlin               | 23.9253  | 120.4096 | Taipei_CWB        | 25.01468 | 121.5384 |
| Fukue               | 32.752   | 128.682  | Ubon_Ratchathani  | 15.24552 | 104.871  |
| Fukuoka             | 33.524   | 130.475  | USM_Penang        | 5.35838  | 100.3023 |
| Gandhi_College      | 25.871   | 84.12794 | Ussuriysk         | 43.7004  | 132.1635 |
| Gangneung_WNU       | 37.771   | 128.867  | XiangHe           | 39.7536  | 116.9615 |
| Gosan_NIMS_SNU      | 33.3001  | 126.2058 | Xitun             | 24.1622  | 120.6169 |
| Gosan_SNU           | 33.29222 | 126.1617 | Yonsei_University | 37.56443 | 126.9348 |
| Gwangju_GIST        | 35.22828 | 126.8431 |                   |          |          |

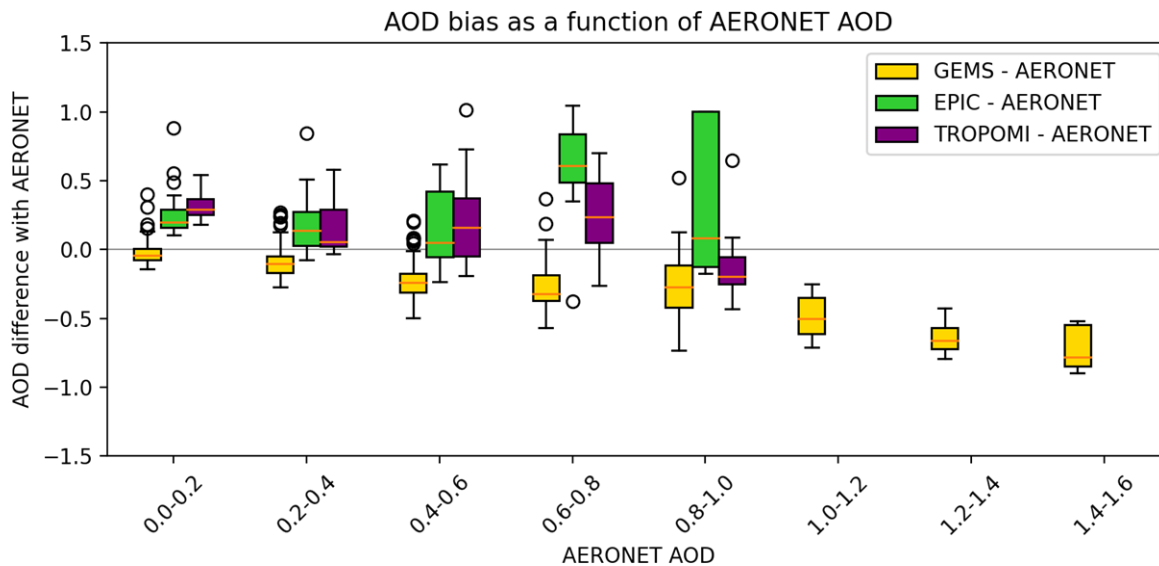

Figure S1. AOD bias as a function of AERONET AOD in box plots. Yellow, green, and purple indicates GEMS, EPIC, and TROPOMI bias with AERONET AOD.

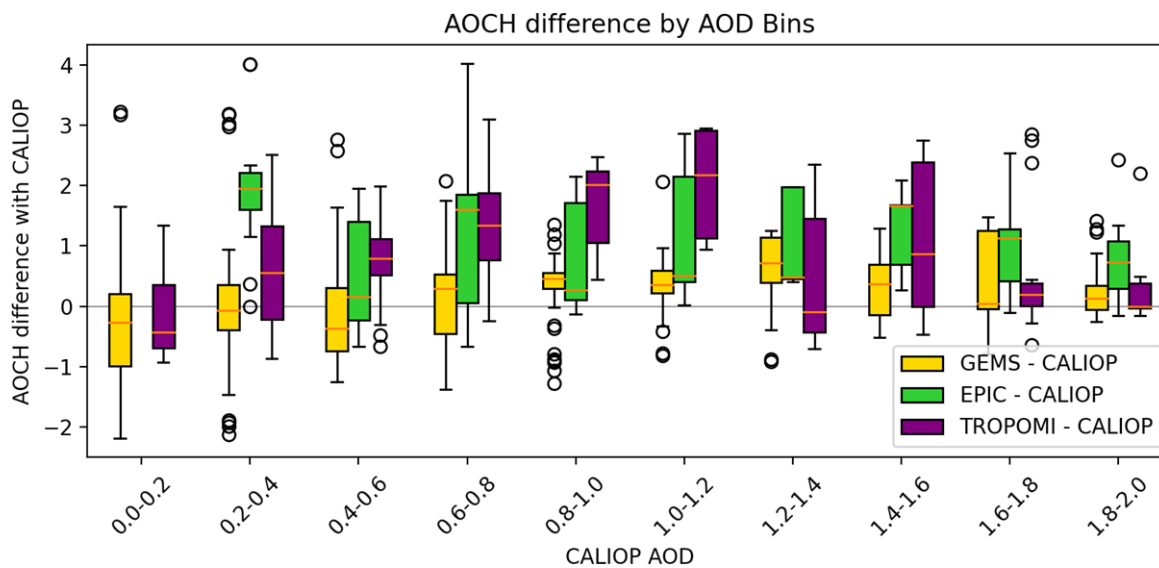

10 Figure S2. AOCH bias as a function of CALIOP AOD in box plots. Yellow, green, and purple indicates GEMS, EPIC, and TROPOMI bias with CALIOP AOCH.

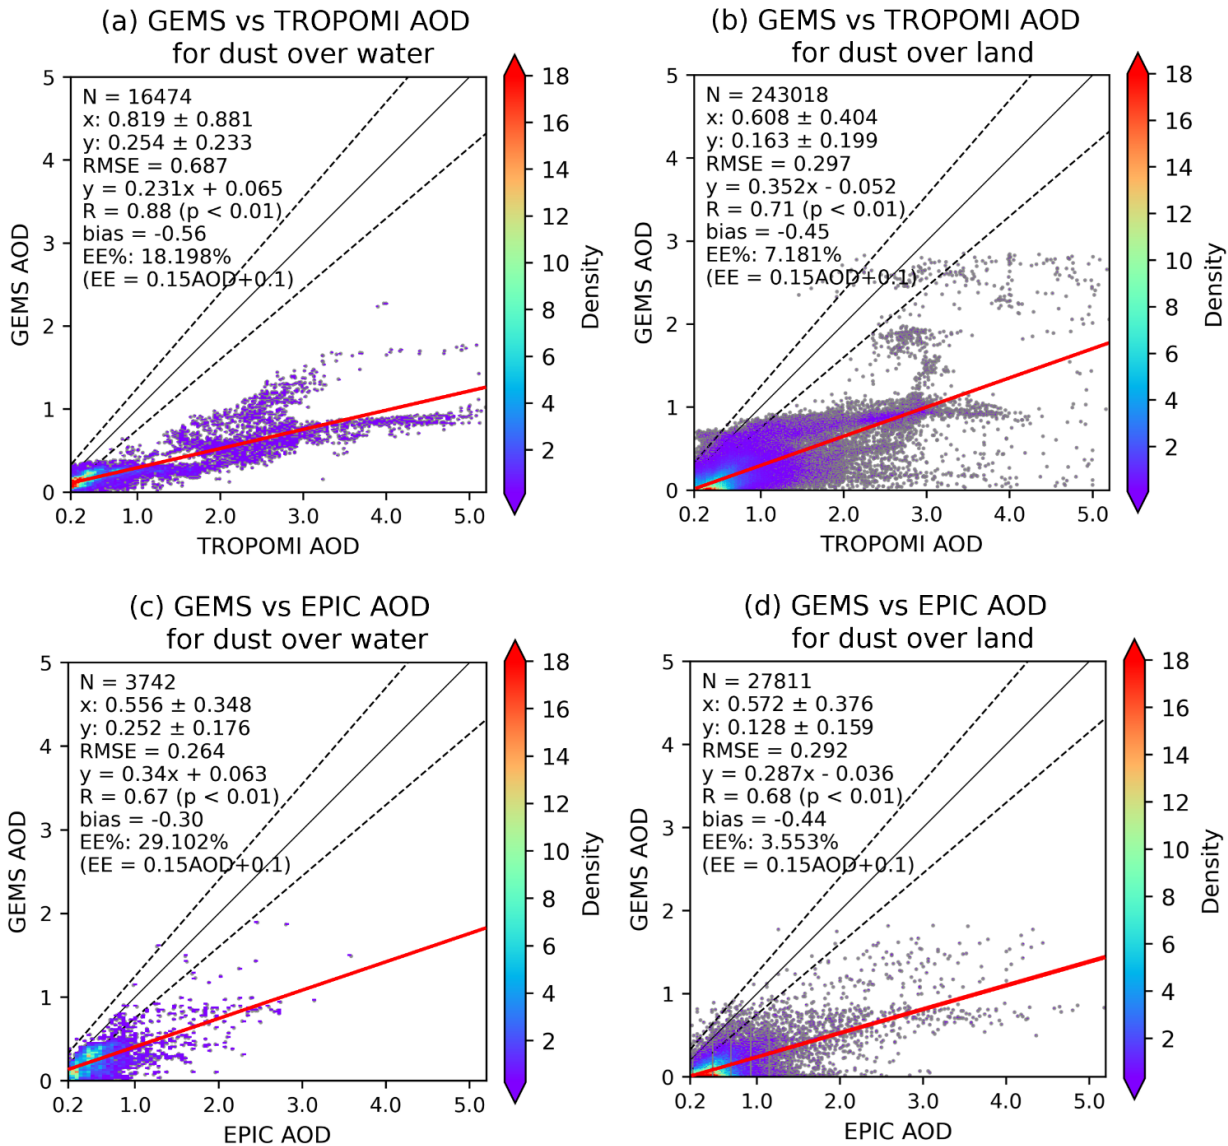

15 **Figure S3.** GEMS AOD compared with the corresponding TROPOMI and EPIC products for dust cases. Scatter density plots of (a) GEMS AOD versus TROPOMI AOD over water, (b) same as (a) but for land, (c) GEMS AOD versus EPIC AOD for water, and (d) same as (c) but for land. Black solid line is the one-to-one line, and the red solid line is the regression line. The dotted lines indicate error envelopes ( $EE = \pm 0.15 AOD + 0.1$ ). TROPOMI and EPIC AOD does not have retrieval for less than 0.2, therefore, the figures axis start from where the data exists.

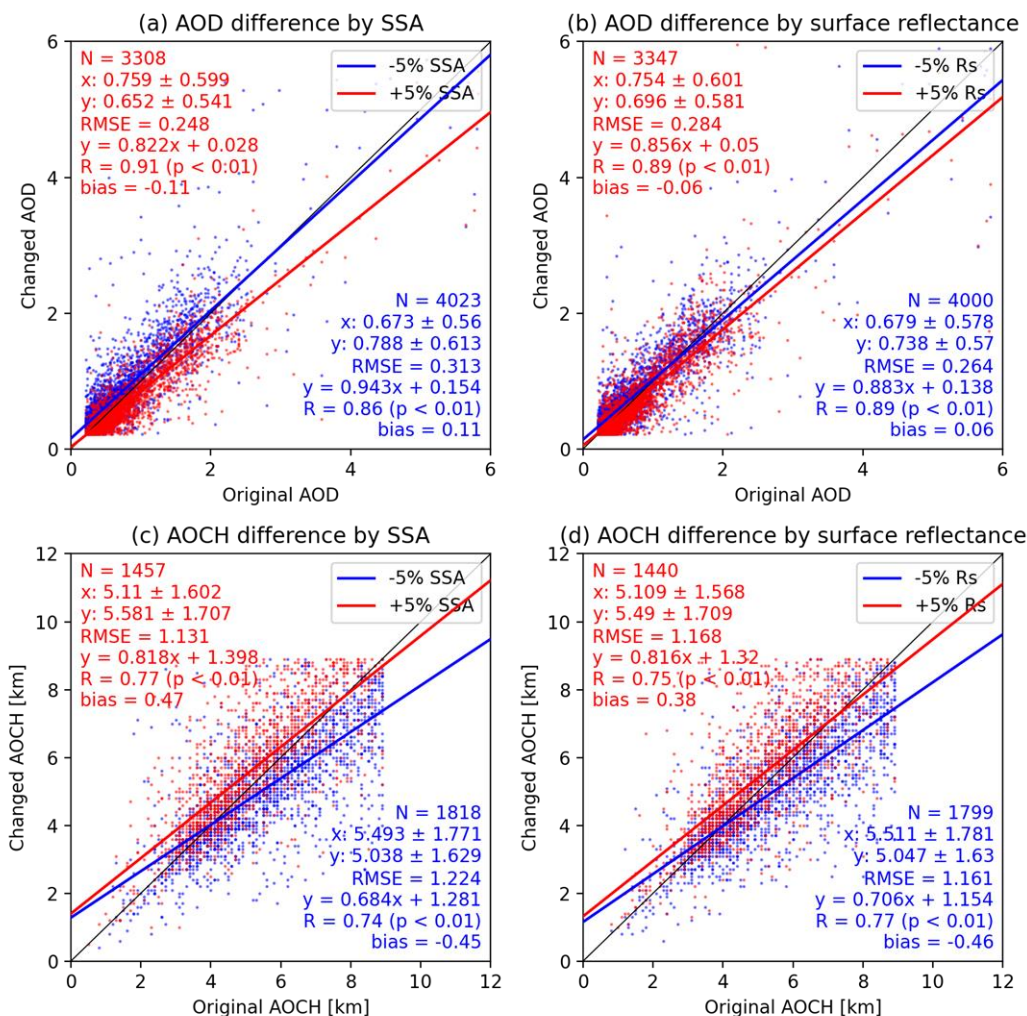

20 Figure S4. Sensitivity test for AOD and AOCHE on SSA and surface reflectance.

Table S2. Aerosol model comparison used in AOD/ALH retrievals for GEMS and TROPOMI/EPIC

|      | GEMS AEH  |         |         | EPIC/TROPOMI AOCHE                       |                              |                     |
|------|-----------|---------|---------|------------------------------------------|------------------------------|---------------------|
|      | HAF       | Dust    | NA      | Dust                                     | Smoke                        |                     |
| mr   | 1.46      | 1.48    | 1.41    | $0.00428 \ln \tau + 1.55$<br>(675 nm)    | $0.026\tau + 1.513$ (680 nm) |                     |
| mi   | 0.02044   | 0.00414 | 0.00401 | $0.00197 \ln \tau + 0.00268$<br>(675 nm) | 0.00857 (680 nm)             |                     |
| Reff | Fine mode | 0.0854  | 0.0644  | 0.1013                                   | $0.0152\tau + 0.122$         | $0.017\tau + 0.178$ |

|                  |                                                            |           |         |                 |                                                       |                     |
|------------------|------------------------------------------------------------|-----------|---------|-----------------|-------------------------------------------------------|---------------------|
|                  | Coarse mode                                                | 1.4115    | 1.0392  | 0.8176          | -                                                     | $0.579\tau+2.477$   |
| V <sub>eff</sub> | Fine mode                                                  | 1.5421    | 1.4420  | 1.5870          | $0.156\tau+0.227$                                     | 1.26                |
|                  | Coarse mode                                                | 1.7630    | 1.6436  | 1.9371          | -                                                     | 0.278               |
| fmf              |                                                            | 0.99994   | 0.99823 | 0.99980         | $-0.0696 \ln \tau + 0.37$                             | $0.162\tau+0.532$   |
| SSA              | Retrieved together with AOD from AERONET inversion dataset |           |         |                 | Coarse mode:<br>$0.0214 \ln \tau + 0.949$<br>(675 nm) |                     |
| Phase function   | Mie                                                        | Fine: Mie |         | Coarse: Dynamic |                                                       | Mie                 |
|                  |                                                            |           |         |                 |                                                       | AERONET climatology |

$\tau$  is the AOD at 680 nm.

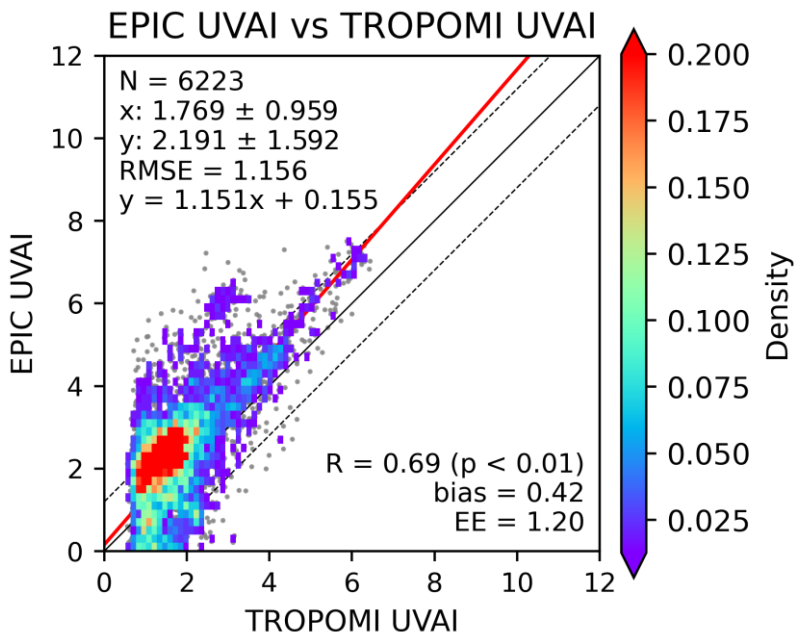

25 **Figure S5. Comparison of EPIC with TROPOMI UVAI.** The one-to-one line is represented by a black solid line, while the regression line is shown in red.

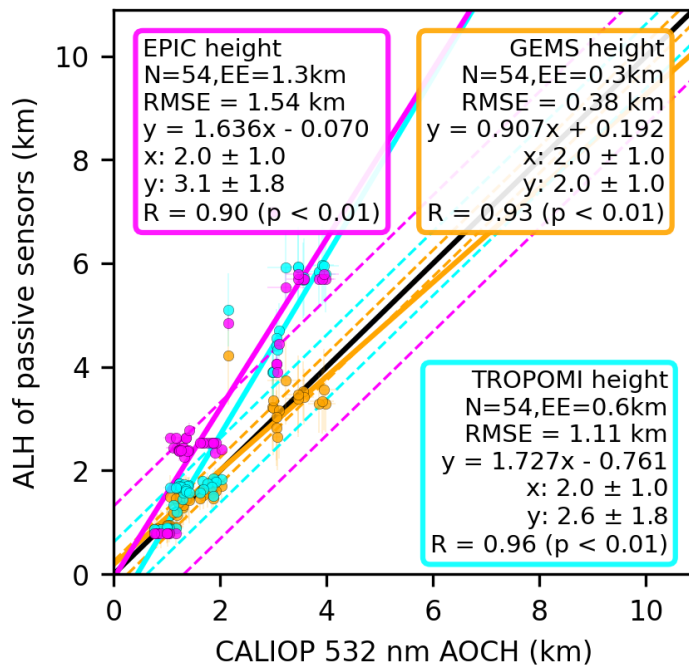

30 **Figure S6.** Comparison of GEMS, TROPOMI, and EPIC AOC with CALIOP measurements for all cases when data are available from all retrievals. Scatterplot of GEMS (orange), TROPOMI (cyan), and EPIC (magenta) AOC versus CALIOP AOC. The black solid line indicates one-to-one line, and the dotted lines represent error envelop within which data points for each passive satellite product fall within one standard deviation.



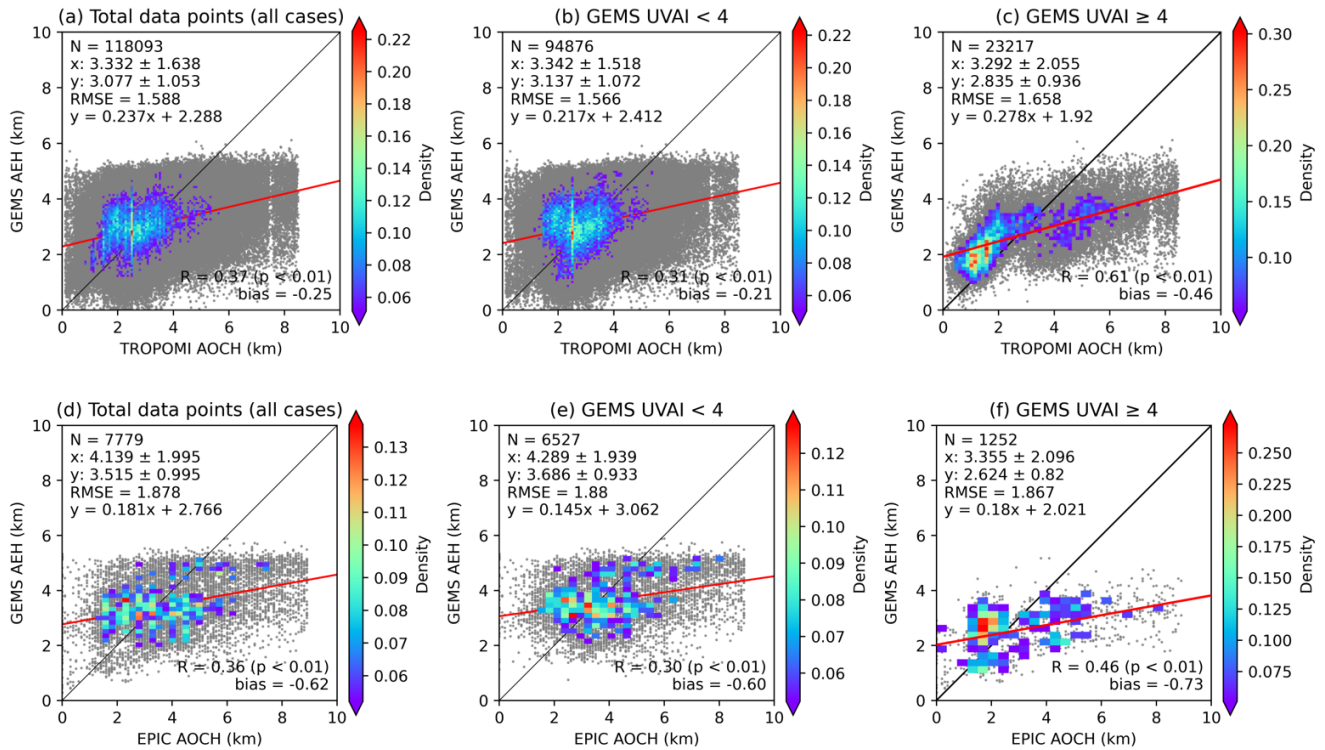

35 **Figure S7. Intercomparison of AOC H values from GEMS, TROPOMI and EPIC for all cases (dust and smoke cases combined) as a function of UVAI. The density scatter plots show the AOC H comparison between GEMS and TROPOMI (a – c), and between GEMS and EPIC (d – f). (b) and (e) represent GEMS data for UVAI < 4, while (c) and (f) represent data for UVAI ≥ 4. GEMS AEH values have been converted to align with the AOC H definitions used by EPIC and TROPOMI.**

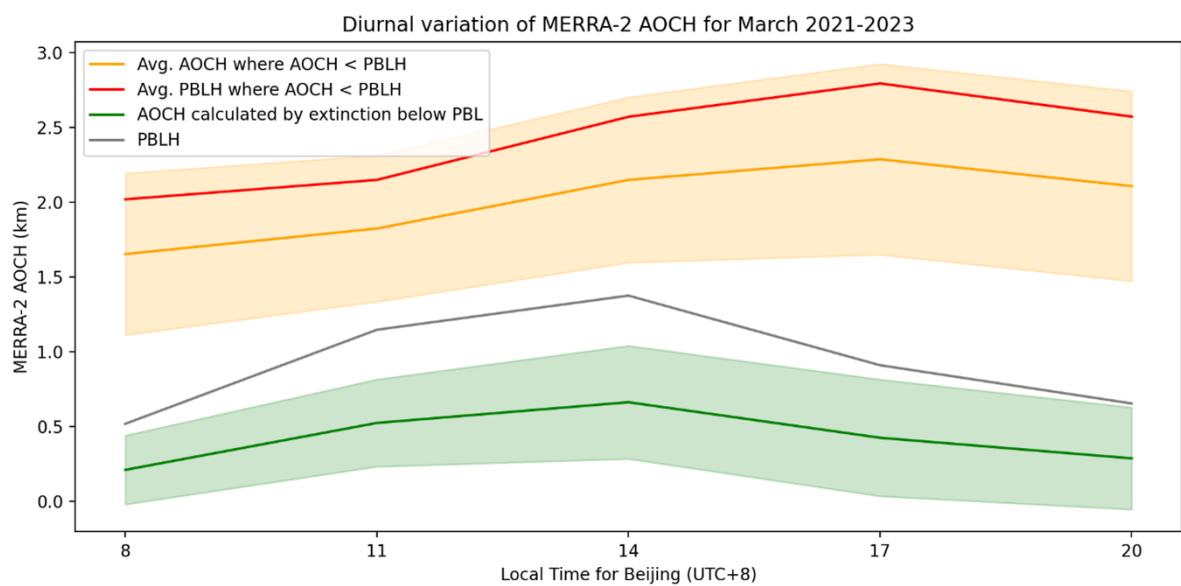

40 **Figure S8.** The diurnal variation of MERRA-2 AOC and PBLH. The orange line and shadow indicate the mean and standard deviation of AOC where AOC is lower than the PBLH, and the red represents the average of those PBLH values. The green line and shadow indicate the mean and the standard deviation of MERRA-2 AOC calculated considering the aerosol extinction only below the PBLH and the grey line indicates the average PBLH from MERRA-2.

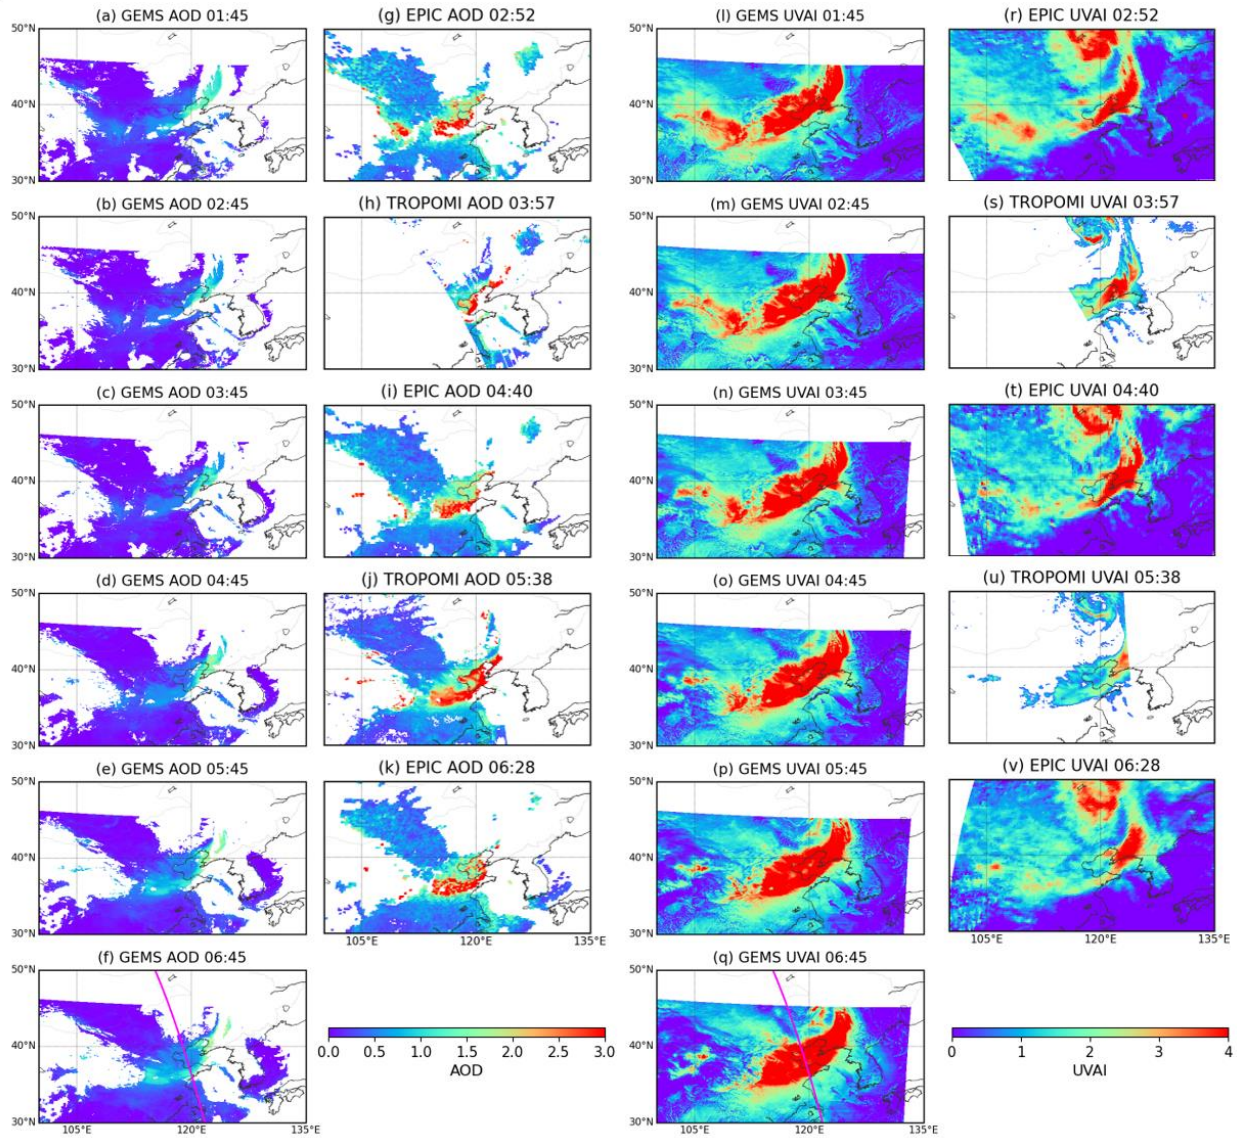

Figure S9. First column (a – f) shows hourly GEMS AOD products presented in timely order from (a) 01:45 to (f) 06:45 (UTC). Second column (g – k) EPIC and TROPOMI ALH aligned with the nearest time of GEMS measurement time for a dust plume case on 28 March 2021. Third column (l – q) shows GEMS UVAI and fourth column (r – v) shows EPIC and TROPOMI UVAI similar to the first and second columns. CALIOP ground tracks are shown as magenta lines on the first and third columns where it has the closest observation time with GEMS.

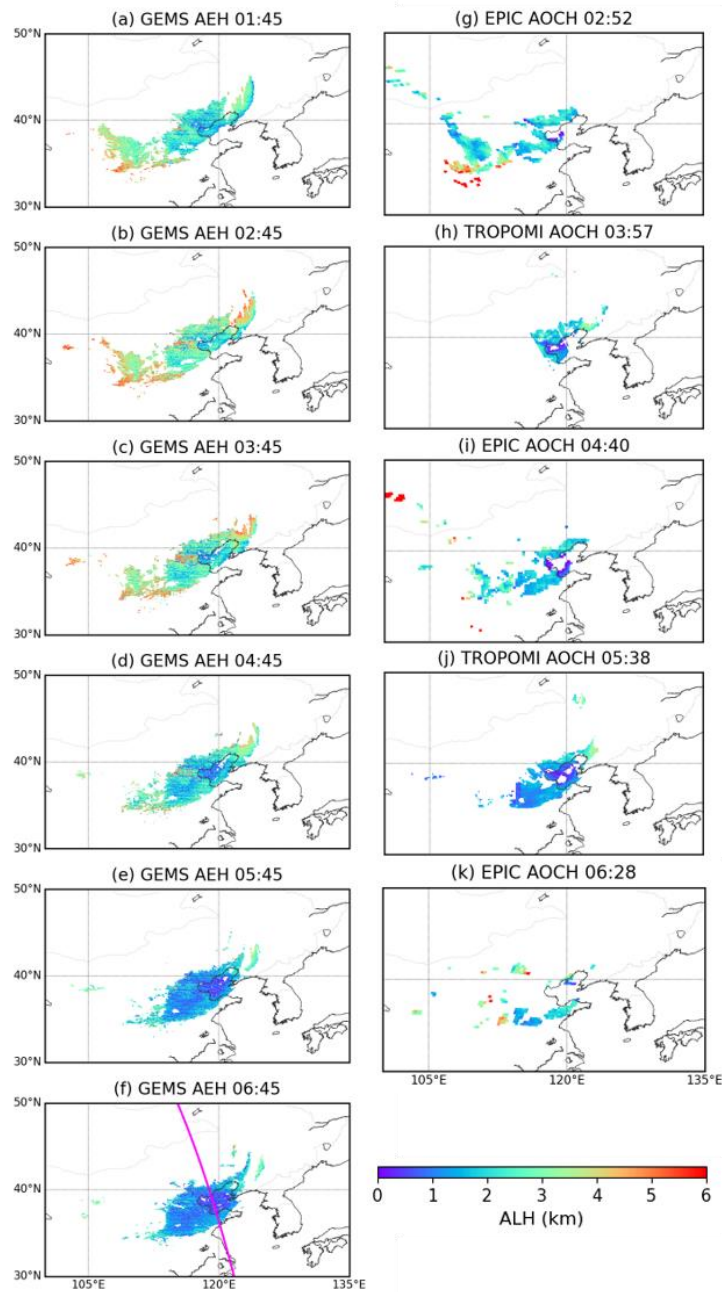

55

Figure S10. Regional coverage for absorbing aerosols screened by UVAI thresholds as 3, 1, 2, for GEMS, TROPOMI, and EPIC, respectively. First column (a – f) shows hourly GEMS ALH products presented in timely order from (a) 01:45 to (f) 06:45 (UTC). Second column (g – k) EPIC and TROPOMI ALH aligned with the nearest time of GEMS measurement time for a dust plume case on 28 March 2021. CALIOP ground tracks are shown as the magenta line on the GEMS ALH map (first column) where it has the closest observation time with GEMS.

60

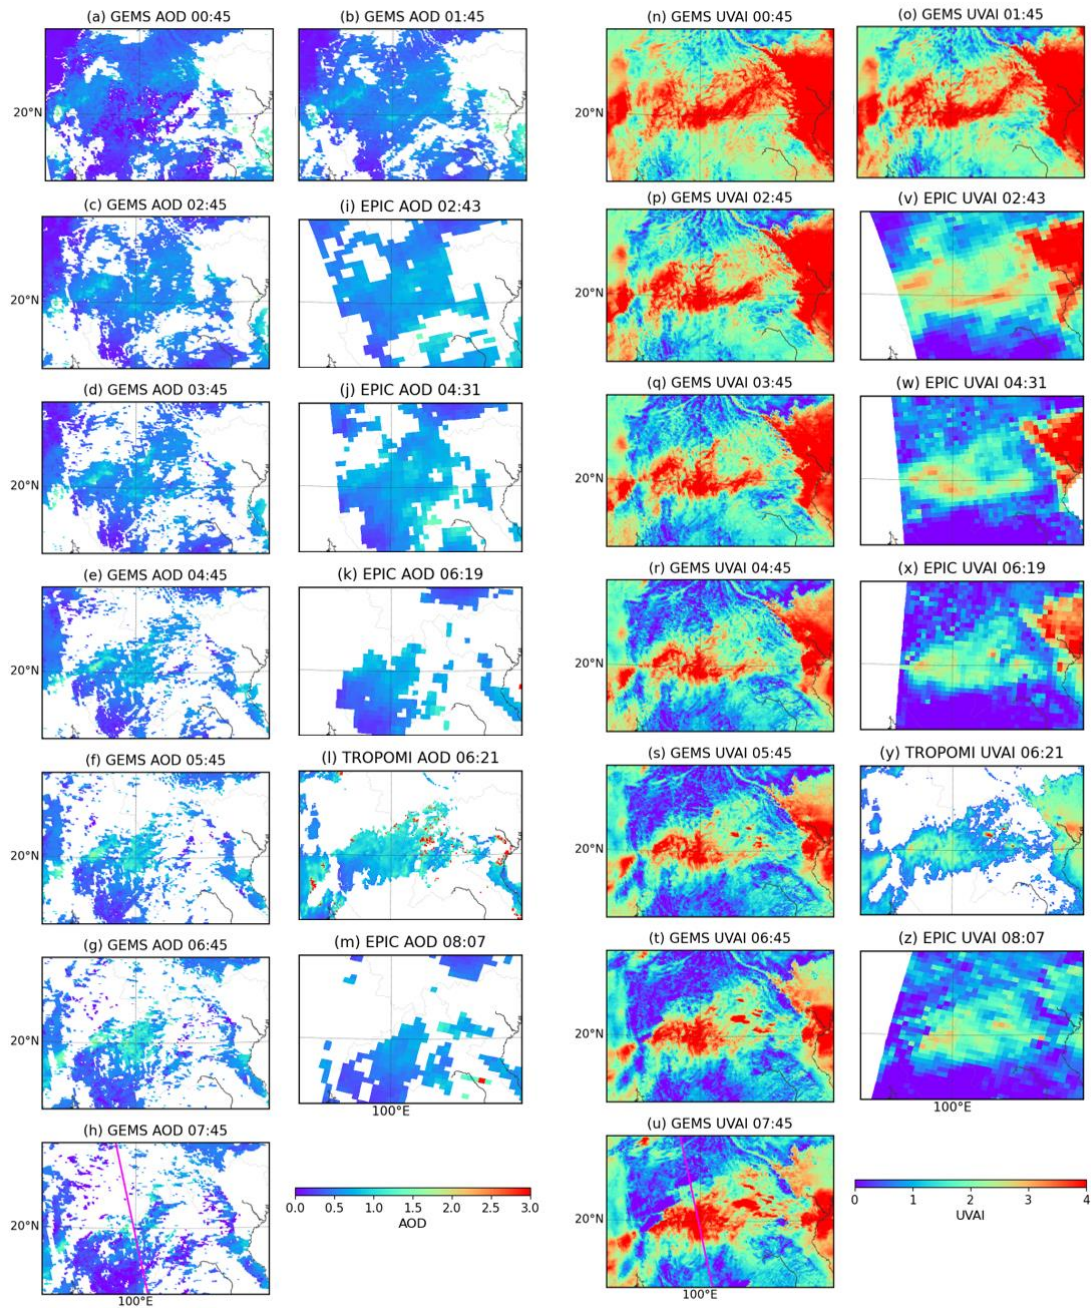

65 **Figure S11.** Figures (a – h) show hourly GEMS AOD products presented in timely order from (a) 00:45 to (f) 07:45 (UTC). Figures (i – m) EPIC and TROPOMI ALH aligned with the nearest time of GEMS measurement time for a dust plume case on 17 April 2023. Figures (n – u) show GEMS UVAI and (o – z) show EPIC and TROPOMI UVAI similar to the AOD figures. CALIOP ground tracks are shown as magenta lines on the first and third columns where it has the closest observation time with GEMS.

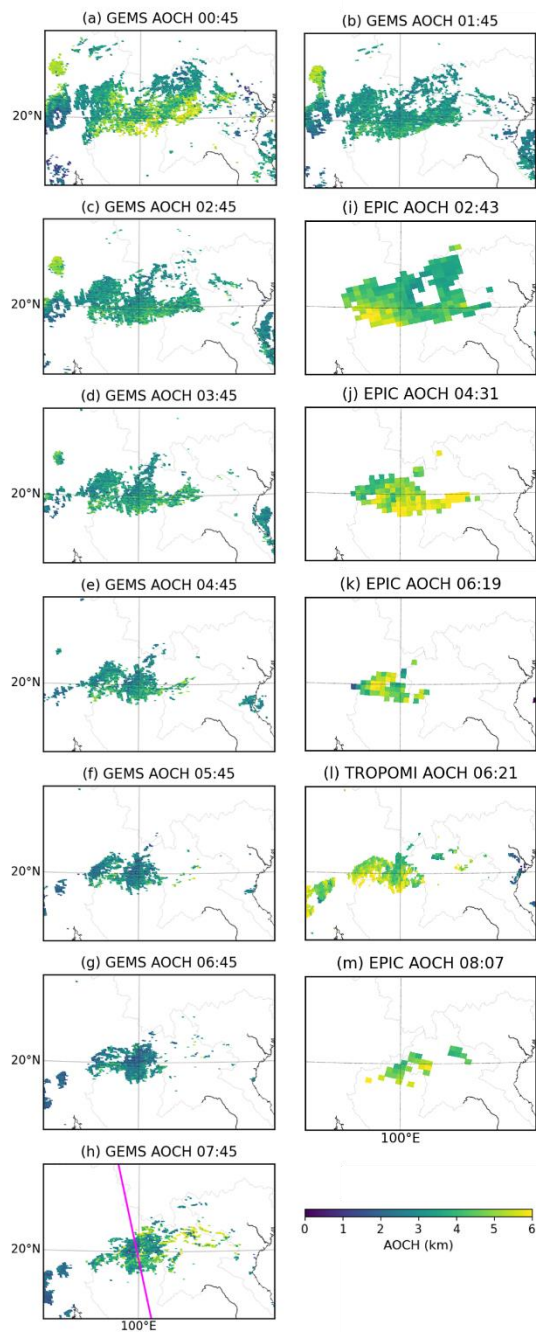

Figure S12. Regional coverage for absorbing aerosols screened by UVAI thresholds as 3, 1.5, 2, for GEMS, TROPOMI, and EPIC, respectively. Figures (a – h) show hourly GEMS ALH products presented in timely order from (a) 00:45 to (f) 07:45 (UTC). Figures (i – m) show EPIC and TROPOMI ALH aligned with the nearest time of GEMS measurement time for a smoke plume case on 17 April 2021. CALIOP ground tracks are shown as the magenta line on the GEMS ALH map (first column) where it has the closest observation time with GEMS.

70
